# Supplementary material
Source: publisher figshare collection journal article supplement (https://brill.figshare.com/articles/dataset/_/28436729)
Supplement: Supplementary file 1 [file 1]

# **Non-galliform birds' attraction to soil mounds outside Chinese pangolin burrows**

*Wei Liu* | ORCID: 0000-0003-3802-4676

College of Life Sciences, Henan Normal University, Xinxiang, Henan 453007, China

Yellow River Ecological Engineering Technology Research Center of Henan

Province, Xinxiang, Henan 453007, China

*2019117@htu.edu.cn*

*Xiaoxiao Nie* | ORCID: 0009-0000-8779-8120

College of Life Sciences, Henan Normal University, Xinxiang, Henan 453007, China

*Xiaopin Zhu*

College of Life Sciences, Henan Normal University, Xinxiang, Henan 453007, China

*Xuanxuan Liu*

College of Life Sciences, Henan Normal University, Xinxiang, Henan 453007, China

*Yanbin Huang*

Management Bureau of Fujian Junzifeng National Nature Reserve, Sanming, Fujian

Province 353000, China

*Haiping ShangGuan*

Management Bureau of Fujian Junzifeng National Nature Reserve, Sanming, Fujian

Province 353000, China

*Wenhao Zeng*

Management Bureau of Fujian Junzifeng National Nature Reserve, Sanming, Fujian

Province 353000, China

*Ning Guo*

Wildlife Protection Center of Fujian Province, Fuzhou, Fujian 350000, China

*Mingle Shi*

Wildlife Protection Center of Fujian Province, Fuzhou, Fujian 350000, China

*Yong Zhang*

Fujian Forestry Survey and Planning Institute, Fuzhou, Fujian 35000, China

*Yanping Xie*

College of Life Sciences, Huaibei Normal University, Huaibei, Anhui 235000, China

*Fei Yu*

College of Life Sciences, Henan Normal University, Xinxiang, Henan 453007, China

Yellow River Ecological Engineering Technology Research Center of Henan

Province, Xinxiang, Henan 453007, China

*yufei@htu.cn*

**Supplementary material**
